# Supplementary material for: Bone Mineral Density Changes in Long-Term Kidney Transplant Recipients: A Real-Life Cohort Study of Native Vitamin D Supplementation
Source: MDPI journal article supplement (doi:10.3390/nu14020323), 2022-01-13
Supplement: s1 [file s1]

# Bone Mineral Density Changes in Long-Term Kidney Transplant Recipients: A Real-Life Cohort Study of Native Vitamin D Supplementation

## Supplementary Materials

**Supplementary Table S1.** T-score, Z-score, and BMD (g/cm<sup>2</sup>) gains at 2 to 3 years follow-up in kidney transplant patients according to WHO classification.

| WHO          | Gain T-Score |      |              |       | Gain Z-Score |      |              |      | Gain BMD     |      |              |      |
|--------------|--------------|------|--------------|-------|--------------|------|--------------|------|--------------|------|--------------|------|
|              | Lumbar Spine | P    | Femoral Neck | P     | Lumbar Spine | P    | Femoral Neck | P    | Lumbar Spine | P    | Femoral Neck | P    |
| Normal       | -0.04 (0.57) | 0.96 | -0.08 (0.38) | 0.98  | 0.01 (0.47)  | 0.79 | -0.12 (0.35) | 0.51 | -0.01 (0.08) | 0.75 | 0.01 (0.05)  | 0.13 |
| Osteopenia   | 0.07 (0.47)  | 0.56 | -0.04 (0.28) | 0.43  | 0.12 (0.45)  | 0.62 | 0.05 (0.45)  | 0.97 | 0.01 (0.07)  | 0.15 | 0.01 (0.07)  | 0.37 |
| Osteoporosis | 0.11 (0.35)  | 0.79 | -0.21 (0.37) | 0.002 | 0.18 (0.39)  | 0.87 | -0.15 (0.40) | 0.22 | -0.10 (0.49) | 0.31 | -0.04 (0.06) | 0.52 |

**Supplementary Table S2.** Mixed model effect of inactive vitamin D on T-score in kidney transplant patients at lumbar vertebral bodies.

| Parameter       | Estimate | Std. Error | df      | t      | Sig.    | 95% CI |        |
|-----------------|----------|------------|---------|--------|---------|--------|--------|
|                 |          |            |         |        |         | LB     | UB     |
| Intercept       | -3.009   | 1.018      | 184.909 | -2.953 | 0.004   | -5.019 | -0.998 |
| Age             | -0.009   | 0.010      | 159.924 | -0.939 | 0.349   | -0.029 | 0.010  |
| Sex             | -0.103   | 0.229      | 180.321 | -0.449 | 0.654   | -0.555 | 0.349  |
| BMI             | 0.099    | 0.037      | 179.684 | 2.686  | 0.008 * | 0.026  | 0.173  |
| 25-OH-Vitamin D | 0.003    | 0.003      | 110.294 | 1.183  | 0.239   | -0.002 | 0.010  |
| Diabetes        | 0.267    | 0.442      | 98.485  | 0.605  | 0.547   | -0.609 | 1.144  |
| HD vintage      | 0.003    | 0.004      | 97.805  | 0.863  | 0.390   | -0.004 | 0.012  |
| Steroids        | -0.137   | 0.104      | 93.845  | -1.311 | 0.193   | -0.345 | 0.070  |

Dependent Variable: T-Score. \* Statistically significant. BMI: body mass index; CI: confidence interval; HD: hemodialysis; LB: lower bound; UB: upper bound.

**Supplementary Table S3.** Mixed model effect of inactive vitamin D on T-score in kidney transplant patients at right femoral neck.

| Parameter       | Estimate | Std. Error | df      | t      | Sig.     | 95% CI |        |
|-----------------|----------|------------|---------|--------|----------|--------|--------|
|                 |          |            |         |        |          | LB     | UB     |
| Intercept       | -1.777   | 0.772      | 150.244 | -2.302 | 0.023    | -3.303 | -0.252 |
| Age             | -0.034   | 0.007      | 114.766 | -4.757 | <0.001 * | -0.048 | -0.019 |
| Sex             | -0.154   | 0.167      | 124.839 | -0.924 | 0.357    | -0.485 | 0.176  |
| BMI             | 0.093    | 0.026      | 122.209 | 3.480  | <0.001 * | 0.040  | 0.146  |
| 25-OH-Vitamin D | -0.003   | 0.003      | 122.234 | -0.885 | 0.378    | -0.010 | 0.004  |
| Diabetes        | 0.307    | 0.270      | 98.815  | 1.137  | 0.258    | -0.228 | 0.842  |
| HD vintage      | -0.002   | 0.002      | 98.555  | -0.839 | 0.403    | -0.007 | 0.003  |
| Steroids        | 0.056    | 0.132      | 130.925 | 0.428  | 0.669    | -0.204 | 0.317  |

Dependent Variable: T-Score. \* Statistically significant. BMI: body mass index; CI: confidence interval; HD: hemodialysis; LB: lower bound; UB: upper bound.

**Supplementary Table S4.** Mixed model effect of inactive vitamin D on BMD (g/cm<sup>2</sup>) in kidney transplant patients at lumbar vertebral bodies.

| Parameter       | Estimate | Std. Error | df      | t      | Sig.   | 95% CI  |       |
|-----------------|----------|------------|---------|--------|--------|---------|-------|
|                 |          |            |         |        |        | LB      | UB    |
| Intercept       | 0.784    | 0.180      | 143.738 | 4.333  | <0.001 | 0.426   | 1.141 |
| Age             | -0.002   | 0.001      | 96.064  | -1.548 | 0.125  | -0.005  | 0.001 |
| Sex             | 0.043    | 0.035      | 99.687  | 1.212  | 0.228  | -0.027  | 0.114 |
| BMI             | 0.010    | 0.005      | 101.151 | 1.852  | 0.067  | -0.0007 | 0.022 |
| 25-OH-Vitamin D | -0.0005  | 0.001      | 151.795 | -0.422 | 0.674  | -0.002  | 0.001 |
| Diabetes        | 0.011    | 0.056      | 93.098  | 0.204  | 0.839  | -0.100  | 0.122 |
| HD vintage      | 0.0004   | 0.0005     | 99.892  | 0.778  | 0.438  | -0.0006 | 0.001 |
| Steroids        | -0.0005  | 0.039      | 164.620 | -0.015 | 0.988  | -0.079  | 0.078 |

Dependent Variable: BMD (g/cm<sup>2</sup>). BMI: body mass index; CI: confidence interval; HD: hemodialysis; LB: lower bound; UB: upper bound.

**Supplementary Table S5.** Mixed model effect of inactive vitamin D on BMD (g/cm<sup>2</sup>) in kidney transplant patients at right femoral neck.

| Parameter       | Estimate | Std. Error | df      | t      | Sig.     | 95% CI  |        |
|-----------------|----------|------------|---------|--------|----------|---------|--------|
|                 |          |            |         |        |          | LB      | UB     |
| Intercept       | 0.607    | 0.098      | 149.014 | 6.189  | <0.001   | 0.413   | 0.801  |
| Age             | -0.004   | 0.0008     | 111.596 | -4.590 | <0.001 * | -0.005  | -0.002 |
| Sex             | 0.018    | 0.021      | 120.023 | 0.867  | 0.388    | -0.023  | 0.059  |
| BMI             | 0.011    | 0.003      | 117.902 | 3.397  | <0.001 * | 0.004   | 0.018  |
| 25-OH-Vitamin D | -0.0002  | 0.0005     | 125.972 | -0.431 | 0.667    | -0.001  | 0.0007 |
| Diabetes        | 0.070    | 0.033      | 98.574  | 2.096  | 0.039 *  | 0.003   | 0.136  |
| HD vintage      | -0.0002  | 0.0003     | 98.523  | -0.750 | 0.455    | -0.0009 | 0.0004 |
| Steroids        | 0.024    | 0.017      | 138.802 | 1.345  | 0.181    | -0.011  | 0.059  |

Dependent Variable: BMD (g/cm<sup>2</sup>). \* Statistically significant. BMI: body mass index; CI: confidence interval; HD: hemodialysis; LB: lower bound; UB: upper bound.
